# Supplementary material for: Dynamic Stability, Symmetry, and Smoothness of Gait in People with Neurological Health Conditions
Source: MDPI journal article supplement (doi:10.3390/s24082451), 2024-04-11
Supplement: s1 [file s1]

Table S1. Results of the statistical analysis (p-values) of the sensor-based features obtained with the instrumental sensor-based assessment in the three dynamic tasks.

| 10MWT           |                    |                     |                   | Fo8WT           |                    |                     |                   | FST             |                    |                     |                |
|-----------------|--------------------|---------------------|-------------------|-----------------|--------------------|---------------------|-------------------|-----------------|--------------------|---------------------|----------------|
|                 | PwTBI<br>vs<br>PwS | PwTBI<br>vs<br>PwPD | PwS<br>vs<br>PwPD |                 | PwTBI<br>vs<br>PwS | PwTBI<br>vs<br>PwPD | PwS<br>vs<br>PwPD |                 | PwTBI<br>vs<br>PwS | PwTBI<br>vs<br>PwPD | PwS vs<br>PwPD |
| StrideFreq      | 0.016              | 0.035               | 0.000             | StrideFreq      | 0.065              | 0.038               | 0.002             | Nr Step         | 0.012              | 0.141               | 0.000          |
| StrideDur       | 0.016              | 0.035               | 0.000             | StrideDur       | 0.050              | 0.028               | 0.001             | StepFreq        | 0.011              | 0.113               | 0.000          |
| StrideLength    | 0.001              | 0.947               | 0.004             | WS              | 0.001              | 0.718               | 0.003             | StepDur         | 0.011              | 0.113               | 0.000          |
| WS              | 0.001              | 0.355               | 0.001             | nRMS_AP_pelvis  | 0.047              | 0.296               | 0.005             | nRMS_AP_pelvis  | 0.513              | 0.283               | 0.192          |
| nRMS_AP_pelvis  | 0.070              | 0.024               | 0.001             | nRMS_ML_pelvis  | 0.108              | 0.309               | 0.065             | nRMS_ML_pelvis  | 0.370              | 0.728               | 0.247          |
| nRMS_ML_pelvis  | 0.134              | 0.057               | 0.004             | nRMS_AP_sternum | 0.000              | 0.089               | 0.002             | nRMS_AP_sternum | 0.007              | 0.565               | 0.012          |
| nRMS_AP_sternum | 0.000              | 0.341               | 0.003             | nRMS_ML_sternum | 0.004              | 0.758               | 0.001             | nRMS_ML_sternum | 0.018              | 0.336               | 0.056          |
| nRMS_ML_sternum | 0.003              | 0.925               | 0.007             | nRMS_AP_head    | 0.001              | 0.169               | 0.011             | nRMS_AP_head    | 0.011              | 0.666               | 0.008          |
| nRMS_AP_head    | 0.002              | 0.870               | 0.000             | nRMS_ML_head    | 0.000              | 0.931               | 0.000             | nRMS_ML_head    | 0.036              | 0.396               | 0.035          |
| nRMS_ML_head    | 0.017              | 0.457               | 0.002             | iHR_AP          | 0.009              | 0.134               | 0.000             | iHR_AP          | 0.000              | 0.640               | 0.000          |
| iHR_AP          | 0.015              | 0.512               | 0.002             | iHR_ML          | 0.620              | 0.398               | 0.925             | iHR_ML          | 0.003              | 0.496               | 0.035          |
| iHR_ML          | 0.006              | 0.369               | 0.011             | iHR_CC          | 0.000              | 0.640               | 0.000             | iHR_CC          | 0.001              | 0.862               | 0.000          |
| iHR_CC          | 0.000              | 0.127               | 0.000             | LDLJw_AP        | 0.314              | 0.005               | 0.001             | LDLJw_AP        | 0.925              | 0.001               | 0.009          |
| LDLJw_AP        | 0.183              | 0.001               | 0.000             | LDLJw_ML        | 0.923              | 0.061               | 0.046             | LDLJw_ML        | 0.461              | 0.017               | 0.176          |
| LDLJw_ML        | 0.380              | 0.023               | 0.141             | LDLJw_CC        | 0.017              | 0.398               | 0.017             | LDLJw_CC        | 0.072              | 0.192               | 0.012          |
| LDLJw_CC        | 0.057              | 0.627               | 0.033             |                 |                    |                     |                   |                 |                    |                     |                |

10MWT: 10 meter walk test; Fo8WT: Figure of eight Test; FST: Fukuda Stepping Test; PwTBI: People with Traumatic Brain Injury; PwPD: People with Parkinson Disease; PwS: People with Stroke; Nr Step: number of steps; Step Freq: step frequency; StepDur: step duration; WS: walking speed; nRMS: Normalized Root Mean Square; iHR Improved Harmonic Ratio; AP: antero-posterior; ML: medio-lateral; CC: Cranio-Caudal; LDLJw: Log Dimensionless Jerk angular velocity.
